# Supplementary material for: Isotype-Specific Fc Effector Functions Enhance Antibody-Mediated Rift Valley Fever Virus Protection In Vivo
Source: PubMed Central journal article supplement (PMC8550229; doi:10.1128/msphere.00556-21), 2021-09-08

**A**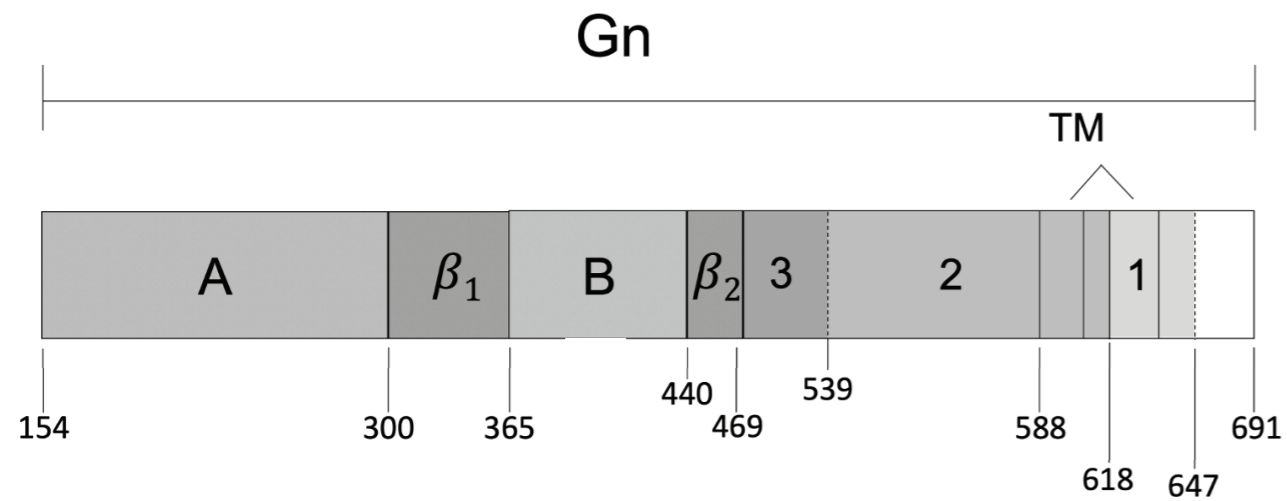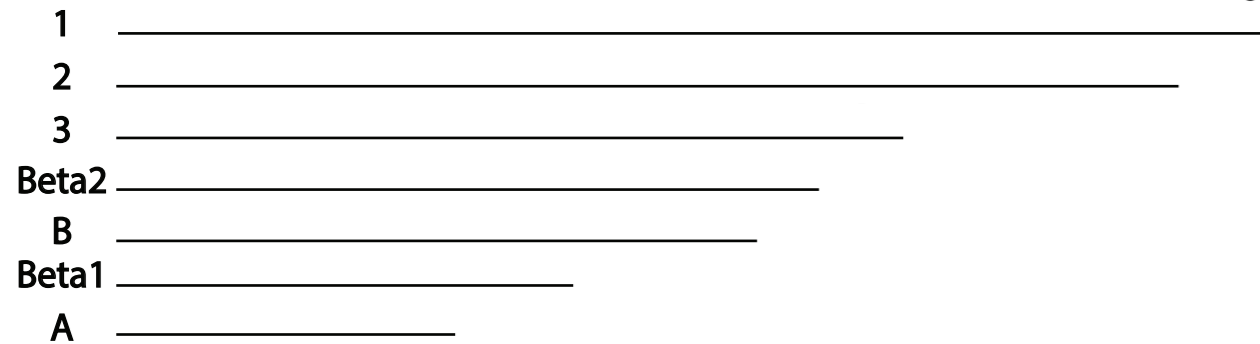**B**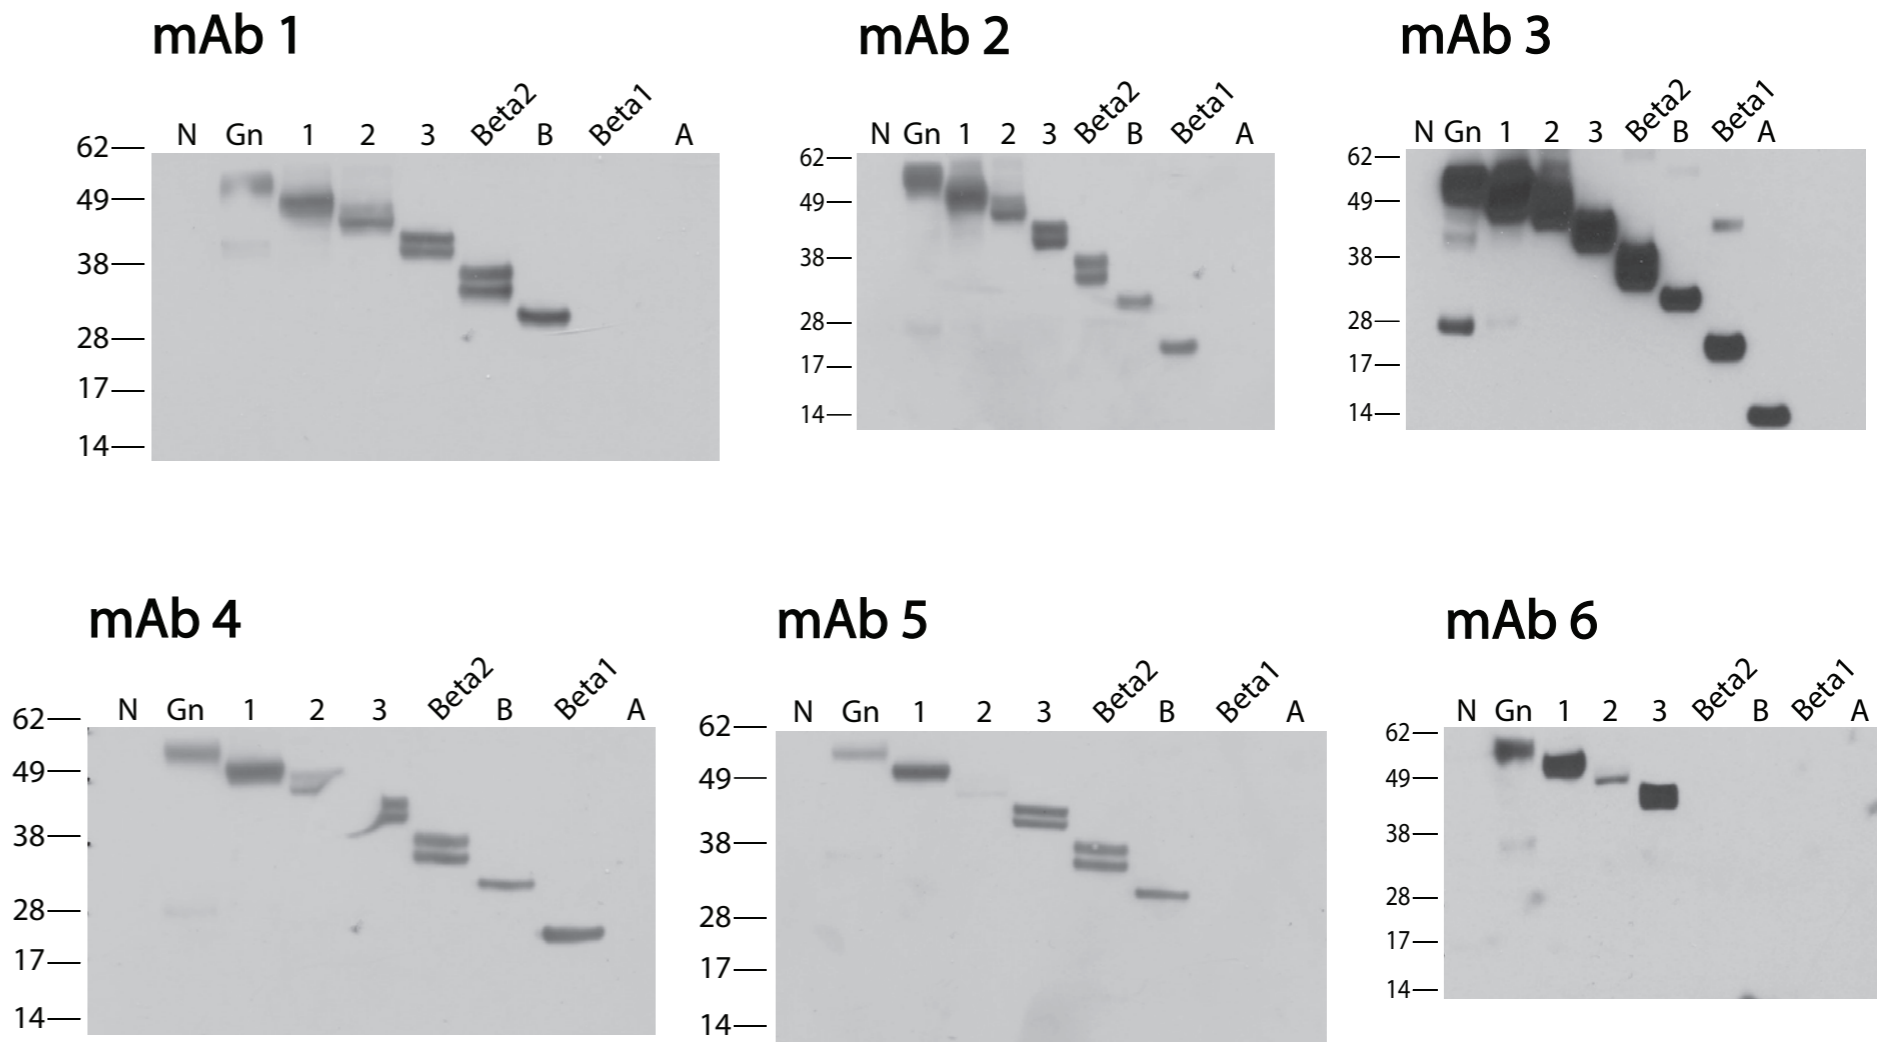

Supplement: msphere.00556-21-sf001.pdf [file msphere.00556-21-sf001.pdf]
