# Supplementary material for: Isotype-Specific Fc Effector Functions Enhance Antibody-Mediated Rift Valley Fever Virus Protection In Vivo
Source: PubMed Central journal article supplement (PMC8550229; doi:10.1128/msphere.00556-21), 2021-09-08
Supplement: msphere.00556-21-sf003.pdf [file msphere.00556-21-sf003.pdf]

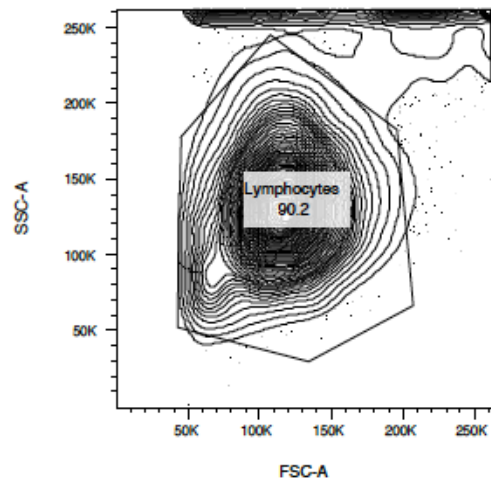

ADCC8\_IgG1 negative.fcs  
Ungated  
45650

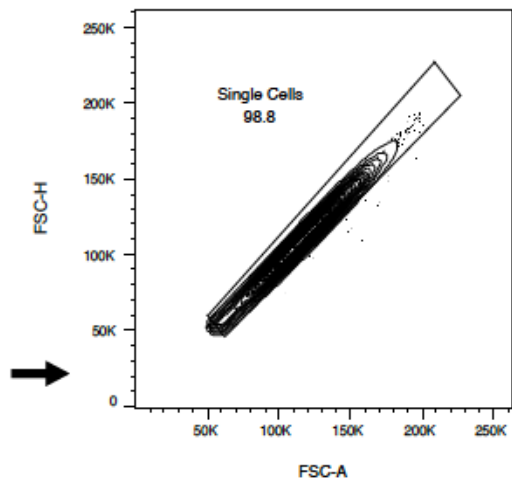

ADCC8\_IgG1 negative.fcs  
Lymphocytes  
41188

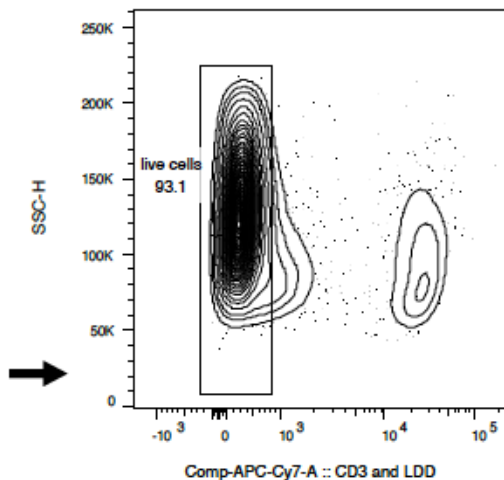

ADCC8\_IgG1 negative.fcs  
Single Cells  
40469

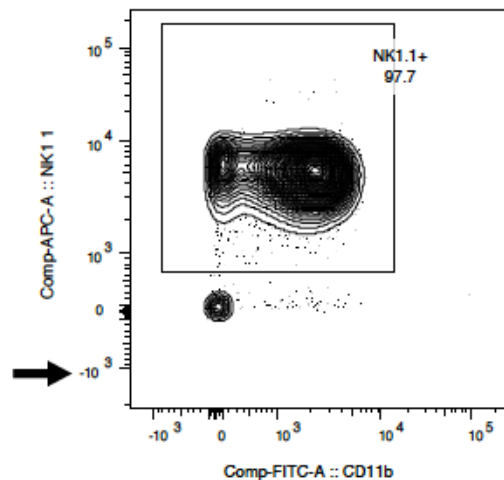

ADCC8\_IgG1 negative.fcs  
live cells  
37696

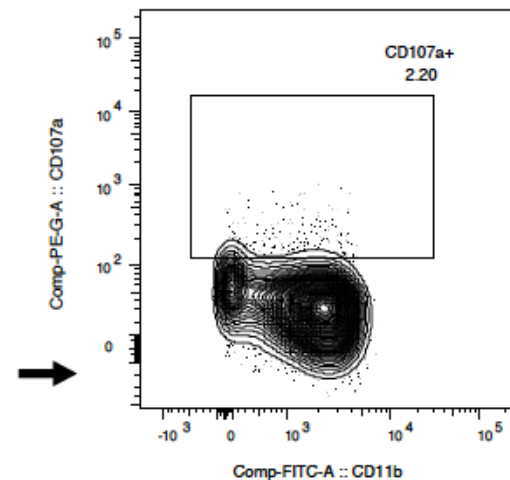

ADCC8\_IgG1 negative.fcs  
NK1.1+  
36830
